# Supplementary material for: PEA15 loss of function and defective cerebral development in the domestic cat
Source: PLOS journal article supplement (doi:10.1371/journal.pgen.1008671), 2020-12-08
Supplement: S1 (10.1371/journal.pgen.1008671.s001) [file journal.pgen.1008671.s001]

**S1 Table.** Table of cats from the GM2A and MPSVI breeding colonies where the cerebral dysgenesis pathogenic variant was identified. Affected status is denoted by color with unaffected cats in white, obligate carriers based on breeding in grey, and affected cats in black.

| Cat ID #  | Sex    | GM2A genotype | MPSVI genotype | Cerebral Dysgenesis Phenotype | PEA15 genotype   | WGS ID       | RNAseq ID    | Amplicon ID  |
|-----------|--------|---------------|----------------|-------------------------------|------------------|--------------|--------------|--------------|
| 2913      | male   | unknown       | 1              | Unaffected                    | 0 or 1 (Imputed) |              |              |              |
| R22       | male   | 1             | 0              | Unaffected                    | 0 (Imputed)      |              |              |              |
| R21       | female | 1             | 0              | Unaffected                    | 0 (Imputed)      |              |              |              |
| 596       | female | 0             | 0              | Unaffected                    | 0 or 1 (Imputed) |              |              |              |
| B15 (564) | female | 0             | unknown        | Unaffected                    | 1 (Imputed)      |              |              |              |
| R24       | male   | 1             | 0              | Unaffected                    | 0 (Imputed)      |              |              |              |
| B17       | female | 0             | 1              | Unaffected                    | 1 (Imputed)      |              |              |              |
| B39       | male   | unknown       | unknown        | Unaffected                    | 1 (Imputed)      |              |              |              |
| R23       | male   | 1             | 0              | Unaffected                    | 0 (Imputed)      |              |              |              |
| BXR 261   | female | 0             | 1              | Unaffected (obligate carrier) | 1                |              |              | SAMN10276058 |
| B88       | female | unknown       | unknown        | Unaffected                    | 1 (Imputed)      |              |              |              |
| 10-263    | male   | 0             | 1              | Unaffected (obligate carrier) | 1                | SAMN10276158 |              | SAMN10276070 |
| 10-267    | female | 1             | 0              | Unaffected (obligate carrier) | 1                |              | SAMN10276168 | SAMN10276084 |
| 851       | male   | 1             | 1              | Unknown (early death)         | 2                |              |              | SAMN10276104 |
| 854       | male   | 0             | 1              | Unaffected                    | 1                |              |              | SAMN10276116 |
| 10-717    | female | 0             | unknown        | Unaffected (obligate carrier) | 1 (imputed)      |              |              |              |
| 752       | female | 0             | 0              | Unaffected                    | 1                |              |              | SAMN10276097 |
| 736       | male   | 0             | 0              | Unaffected                    | 1                |              |              | SAMN10276061 |
| 751       | female | 0             | 2              | Unaffected                    | 1                |              |              | SAMN10276085 |
| 753       | male   | 0             | 2              | Unaffected                    | 1                |              |              | SAMN10276109 |
| 772       | female | 0             | 0              | Unaffected                    | 1                |              |              | SAMN10276066 |
| 773       | female | 0             | 1              | Unaffected                    | 0                |              |              | SAMN10276122 |
| 10-670    | female | 0             | 1              | Unaffected (obligate carrier) | 1                | SAMN10276154 | SAMN10276172 |              |
| 492       | female | unknown       | 1              | Unaffected                    | 0 (Imputed)      |              |              |              |
| 10-820    | male   | 0             | 1              | Unaffected                    | 1                |              |              | SAMN10276095 |
| 10-737    | female | 0             | 2              | Affected                      | 2                |              |              | SAMN10276119 |
| 10-498    | male   | 0             | 0              | Unaffected                    | 1                |              |              | SAMN10276130 |
| 10-499    | female | 0             | 1              | Affected                      | 2                |              | SAMN10276171 | SAMN10276142 |
| 858       | male   | 0             | 0              | Unaffected                    | 1                |              |              | SAMN10276140 |
| 860       | male   | 0             | 2              | Unaffected                    | 1                |              |              | SAMN10276152 |
| 10-494    | male   | 0             | 0              | Unaffected                    | 0                |              |              | SAMN10276082 |
| 10-496    | male   | 0             | 1              | Unaffected                    | 1                |              |              | SAMN10276106 |
| 10-738    | male   | 0             | 1              | Unaffected                    | 0                |              |              | SAMN10276131 |
| 10-739    | female | 0             | 1              | Unknown (early death)         | 1                |              |              | SAMN10276143 |
| 857       | male   | 0             | 0              | Unaffected                    | 0                |              |              | SAMN10276135 |
| 10-818    | male   | 0             | 1              | Unknown (early death)         | 0                |              |              | SAMN10276071 |
| 10-819    | male   | 0             | 1              | Unknown (early death)         | 2                |              |              | SAMN10276083 |
| 10-495    | female | 0             | 1              | Unaffected                    | 1                |              |              | SAMN10276094 |
| 10-740    | male   | 0             | 1              | Unaffected                    | 1                |              |              | SAMN10276060 |
| 863       | female | 0             | 0              | Unknown (early death)         | 2                |              |              | SAMN10276064 |
| 10-821    | male   | 0             | 1              | Affected                      | 2                |              |              | SAMN10276107 |

|        |        |   |   |                               |   |              |              |              |
|--------|--------|---|---|-------------------------------|---|--------------|--------------|--------------|
| 10-497 | female | 0 | 1 | Unaffected                    | 1 |              |              | SAMN10276118 |
| 10-741 | male   | 0 | 2 | Unaffected                    | 1 |              |              | SAMN10276072 |
| 10-471 | male   | 1 | 0 | Unaffected (obligate carrier) | 1 |              | SAMN10276169 | SAMN10276096 |
| 10-822 | male   | 0 | 2 | Affected                      | 2 |              |              | SAMN10276150 |
| 10-487 | male   | 0 | 2 | Affected                      | 2 |              |              | SAMN10276108 |
| 823    | male   | 0 | 0 | Unaffected                    | 1 |              |              | SAMN10276067 |
| 10-759 | male   | 0 | 2 | Unaffected                    | 1 |              |              | SAMN10276062 |
| 10-760 | male   | 0 | 2 | Unaffected                    | 1 |              |              | SAMN10276074 |
| 10-758 | male   | 0 | 0 | Affected                      | 2 |              |              | SAMN10276137 |
| 825    | male   | 0 | 1 | Unaffected                    | 1 |              |              | SAMN10276079 |
| 10-488 | female | 0 | 0 | Affected                      | 2 |              |              | SAMN10276101 |
| 10-757 | female | 0 | 2 | Unaffected                    | 1 |              |              | SAMN10276145 |
| 10-490 | male   | 0 | 1 | Unaffected                    | 1 |              |              | SAMN10276120 |
| 10-732 | female | 0 | 1 | Unaffected (obligate carrier) | 1 | SAMN10276157 | SAMN10276174 |              |
| 10-733 | male   | 0 | 0 | Affected                      | 2 |              |              | SAMN10276144 |
| 10-480 | female | 0 | 1 | Unaffected                    | 1 |              |              | SAMN10276089 |
| 10-481 | male   | 0 | 1 | Affected                      | 2 | SAMN10276156 | SAMN10276173 |              |
| 761    | female | 0 | 1 | Unaffected                    | 1 |              |              | SAMN10276149 |
| 10-730 | female | 0 | 0 | Affected                      | 2 | SAMN10276155 |              |              |
| 763    | female | 0 | 1 | Unaffected                    | 0 |              |              | SAMN10276098 |
| 10-479 | female | 0 | 1 | Unaffected                    | 1 |              |              | SAMN10276077 |
| 762    | male   | 0 | 1 | Unaffected                    | 1 |              |              | SAMN10276086 |
| 764    | female | 0 | 1 | Unaffected                    | 1 |              |              | SAMN10276110 |
| 493    | female | 0 | 1 | Unaffected (obligate carrier) | 1 |              | SAMN10276170 | SAMN10276132 |
| 840    | male   | 0 | 1 | Unaffected                    | 0 |              |              | SAMN10276087 |
| 841    | male   | 0 | 1 | Unaffected                    | 1 |              |              | SAMN10276099 |
| 10-817 | female | 0 | 0 | Unaffected                    | 0 |              |              | SAMN10276059 |
| 10-746 | female | 0 | 0 | Unaffected                    | 0 |              |              | SAMN10276125 |
| 10-780 | male   | 1 | 0 | Unaffected                    | 1 |              |              | SAMN10276102 |
| 10-781 | male   | 1 | 0 | Unaffected                    | 0 |              |              | SAMN10276134 |
| 10-782 | female | 1 | 0 | Unaffected                    | 1 |              |              | SAMN10276146 |
| 10-783 | female | 2 | 0 | Affected                      | 2 |              |              | SAMN10276114 |
| 10-742 | female | 1 | 0 | Affected                      | 2 |              | SAMN10276162 |              |
| 10-743 | male   | 2 | 0 | Affected                      | 2 |              |              | SAMN10276113 |
| 10-745 | male   | 2 | 0 | Affected                      | 2 |              |              | SAMN10276073 |
| 10-779 | male   | 0 | 0 | Affected                      | 2 |              |              | SAMN10276090 |
| 10-774 | male   | 0 | 0 | Affected                      | 2 |              | SAMN10276163 |              |
| 10-776 | female | 0 | 0 | Unaffected                    | 0 |              |              | SAMN10276078 |
| 804    | female | 0 | 0 | Unaffected                    | 1 |              |              | SAMN10276075 |
| 805    | female | 0 | 1 | Unaffected                    | 0 |              |              | SAMN10276138 |
| 754    | male   | 0 | 0 | Unaffected                    | 1 |              |              | SAMN10276121 |
| 756    | male   | 0 | 0 | Unaffected                    | 1 |              |              | SAMN10276133 |
| 10-791 | female | 0 | 1 | Unknown (early death)         | 2 |              |              | SAMN10276126 |
| 10-793 | male   | 0 | 2 | Unknown (early death)         | 2 |              |              | SAMN10276063 |
| 855    | male   | 0 | 1 | Unaffected                    | 1 |              |              | SAMN10276128 |
| 859    | male   | 0 | 1 | Unaffected                    | 1 |              |              | SAMN10276147 |
| 10-792 | male   | 0 | 0 | Affected                      | 2 |              | SAMN10276161 |              |
| 844    | male   | 0 | 0 | Unaffected                    | 0 |              |              | SAMN10276151 |
| 847    | female | 0 | 0 | Unaffected                    | 1 |              |              | SAMN10276111 |

|         |        |   |         |                               |             |  |              |              |
|---------|--------|---|---------|-------------------------------|-------------|--|--------------|--------------|
| 845     | male   | 0 | 1       | Unaffected                    | 0           |  |              | SAMN10276068 |
| 10-848  | female | 0 | 0       | Unaffected (obligate carrier) | 1           |  |              | SAMN10276080 |
| 10-850  | female | 0 | 0       | Unaffected                    | 1           |  |              | SAMN10276123 |
| 10-849  | male   | 0 | 0       | Unaffected (obligate carrier) | 1           |  |              | SAMN10276092 |
| 10-829  | male   | 0 | 0       | Affected                      | 2           |  |              | SAMN10276091 |
| 10-830  | male   | 0 | 0       | Affected                      | 2           |  |              | SAMN10276103 |
| 10-831  | female | 0 | unknown | Unaffected                    | 1           |  |              | SAMN10276115 |
| 10-837  | male   | 0 | 1       | Unaffected                    | 1           |  |              | SAMN10276153 |
| 10-839  | female | 0 | 1       | Unaffected                    | 1           |  |              | SAMN10276139 |
| 10-838  | male   | 0 | 1       | Unaffected (obligate carrier) | 1           |  |              | SAMN10276141 |
| 10-836  | male   | 0 | 1       | Unaffected (obligate carrier) | 1           |  |              | SAMN10276127 |
| 10-874  | male   | 0 | 0       | Unaffected                    | 1 (imputed) |  |              |              |
| 877     | male   | 0 | 0       | Affected                      | 2           |  | SAMN10276160 |              |
| 878     | male   | 0 | 0       | Unaffected                    | 1 (imputed) |  |              |              |
| 879     | male   | 0 | 0       | Affected                      | 2           |  | SAMN10276159 |              |
| 880     | male   | 0 | 1       | Unknown (early death)         | 2           |  |              | SAMN10276069 |
| 881     | female | 0 | 0       | Unaffected                    | 0           |  |              | SAMN10276081 |
| 882     | female | 0 | 1       | Affected                      | 2           |  |              | SAMN10276093 |
| 10-883  | female | 0 | 1       | Unaffected                    | 0           |  |              | SAMN10276105 |
| 10-885  | female | 0 | 0       | Unaffected                    | 1           |  |              | SAMN10276076 |
| 912     | female | 0 | 0       | Unaffected                    | 0           |  |              | SAMN10276136 |
| 903     | female | 0 | 0       | Unaffected                    | 1           |  |              | SAMN10276148 |
| 904     | female | 0 | 0       | Unaffected                    | 1           |  |              | SAMN10276112 |
| 909     | female | 0 | 0       | Unaffected                    | 0           |  |              | SAMN10276124 |
| 908     | male   | 0 | 0       | Affected                      | 2           |  |              | SAMN10276065 |
| 894     | female | 0 | 1       | Unaffected                    | 1           |  |              | SAMN10276117 |
| 897     | male   | 0 | 1       | Unaffected                    | 1           |  |              | SAMN10276129 |
| 891     | female | 0 | 1       | Affected                      | 2           |  |              | SAMN10276088 |
| 10-892  | female | 0 | 1       | Affected                      | 2           |  |              | SAMN10276100 |
| 11-1044 | female | 0 | 0       | Unaffected                    | 0           |  | SAMN10276164 |              |
| 8-1344  | male   | 0 | 0       | Unaffected                    | 0           |  | SAMN10276165 |              |
| 7-747   | male   | 0 | 0       | Unaffected                    | 0           |  | SAMN10276166 |              |
| 7-734   | female | 0 | 0       | Unaffected                    | 0           |  | SAMN10276167 |              |
